# Supplementary material
Source: HighWire-hosted journal article supplement (https://www.cmajopen.ca/highwire/filestream/81313/field_highwire_adjunct_files/0/2019-0021-1-at.pdf)
Supplement: 2019-0021-1-at.pdf [file 2019-0021-1-at.pdf]

**Appendix 1 (as provided by the authors): ATC classification codes for opioids and MME dose conversion**

| <b>Opioid Content</b>  | <b>Combination</b>                      | <b>WHO ATC Codes</b> | <b>MME Dose conversion factors</b> |
|------------------------|-----------------------------------------|----------------------|------------------------------------|
| Codeine                | Codeine                                 | R05DA04              | 0.15                               |
| Codeine                | ASA/caffeine/codeine                    | N02BA51              | 0.15                               |
| Codeine                | ASA/caffeine/codeine/butalbital         | N02AA79              | 0.15                               |
| Codeine                | acetaminophen/codeine/caffeine          | N02BE51              | 0.15                               |
| Codeine                | acetaminophen/codeine                   | N02AA59              | 0.15                               |
| Codeine                | codeine/methocarbamol/acetaminophen/ASA | M03BA53              | 0.15                               |
| Hydromorphone          | Hydromorphone                           | N02AA03              | 4                                  |
| Meperidine (Pethidine) | Meperidine (Pethidine)                  | N02AB02              | 0.1                                |
| Morphine               | Morphine                                | N02AA01              | 1                                  |
| Oxycodone              | Oxycodone                               | N02AA05              | 1.5                                |
| Oxycodone              | ASA/oxycodone                           | N02BA51              | 1.5                                |
| Oxycodone              | Oxycodone/acetaminophen                 | N02BE51              | 1.5                                |
| Oxycodone              | Oxycodone/naloxone                      | N02AA55              | 1.5                                |
